# Supplementary material
Source: MDPI journal article supplement (https://www.mdpi.com/2311-5521/8/9/255)
Supplement: s1 [file s1]

Archive with 6 entries (6 files):
- Electronic Supplementary Material_18_09_23.pdf
- Video S1.mp4
- Video S2.mp4
- Video S3.mp4
- Video S4.mp4
- Video S5.mp4
